# Supplementary material
Source: PubMed Central journal article supplement (PMC4836855)
Supplement: NIHMS777521-supplement-Support_Information.pdf [file NIHMS777521-supplement-Support_Information.pdf]

# **Quantification of Epidermal Growth Factor Receptor Expression Level and Binding Kinetics on Cell Surfaces by Surface Plasmon Resonance Imaging**

Fenni Zhang<sup>1,2</sup>, Shaopeng Wang<sup>1\*</sup>, Linliang Yin<sup>1,3</sup>, Yunze Yang<sup>1,2</sup>, Yan Guan<sup>1,2</sup>, Wei Wang<sup>4</sup>, Han Xu<sup>5</sup>, Nongjian Tao<sup>1,2,4\*</sup>

1. Center for Bioelectronics and Biosensors, Biodesign Institute, Arizona State University, Tempe, AZ 85287, USA; 2. School of Electrical Computer and Energy Engineering, Arizona State University, Tempe, Arizona 85287, USA; 3. College of Chemistry and Chemical Engineering, Chongqing University, Chongqing 400044, China; 4. State Key Laboratory of Analytical Chemistry for Life Science, School of Chemistry and Chemical Engineering, Nanjing University, Nanjing 210093, China; 5. Amgen Inc., Thousand Oaks, CA 91320, USA

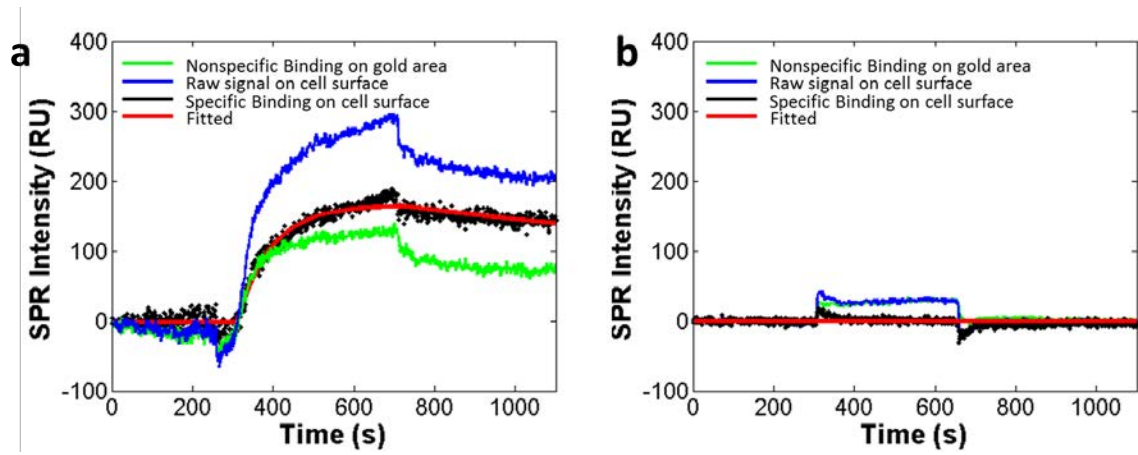

**Fig. S-1** The comparison of nonspecific binding signal on gold area (green curve), raw signal on cell surface (blue curve) and the subtracted antibody induced signal (experimental: black curve, fitted: red curve). (a) The comparison result on EGFR-positive A431 cell chip. (b) The comparison result on EGFR-negative HEK293 cell chip.
